# Supplementary material
Source: Springer Nature journal article supplement (https://www.springermedizin.de/resource/supplementary/13058_2010_9449_MOESM3_ESM.pdf/9702202)

### A (PBS)

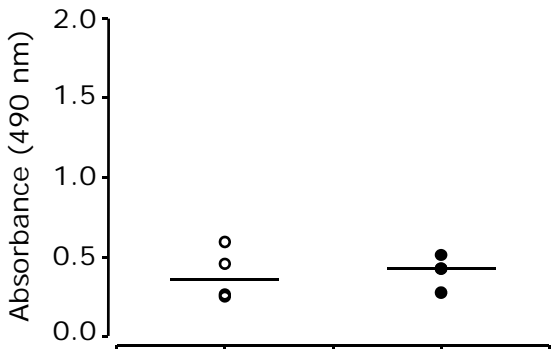

### B (scFv69)

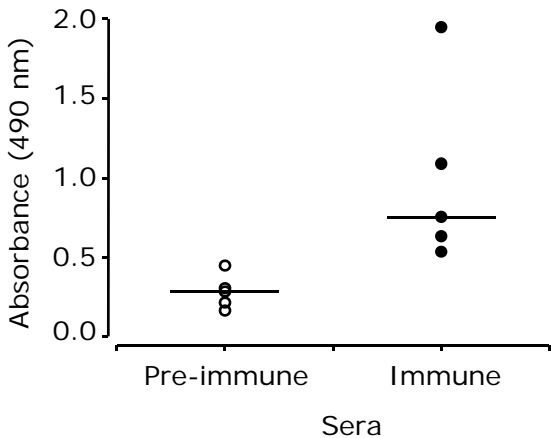

Supplement: MOESM3 [file 9702202]
